# Supplementary material
Source: publisher site journal article supplement (https://www.dovepress.com/article/392882)
Supplement: Supplementary file 1 [file get_supplementary_file.php]

**Preventing and mitigating inter-professional conflict among healthcare professionals in Nigeria**

**Introduction**

Conflict in Nigerian Healthcare has been identified as a critical factor contributing to the poor state of healthcare delivery in the country. This questionnaire is aimed at better understanding the issues underpinning this issue as well as articulating solutions. The information you provide will be anonymised and treated confidentially.

**Please indicate the correct option by inserting a tick in the relevant box (√) or filling the dotted lines.**

**DEMOGRAPHIC DATA**

1. **Gender**

| Male |  | Female |  |
| --- | --- | --- | --- |

1. **Age (Years)**

| 18-30 | 31-40 | 41-50 | 51-60 | Above 60 |
| --- | --- | --- | --- | --- |

1. **Highest Educational Level**

| Diploma |  | First Degree |  | Master’s Degree |  | Doctorate |  |
| --- | --- | --- | --- | --- | --- | --- | --- |

1. **Profession**

| Doctor |  | Pharmacist |  | Lab Scientist |  | Nurse |  | Health Worker |  | Other, please specify …….. |
| --- | --- | --- | --- | --- | --- | --- | --- | --- | --- | --- |

1. **Grade Level**

| Senior |  | Directorate |  | Management |  | Other, please specify ……………........... |
| --- | --- | --- | --- | --- | --- | --- |

1. **Level of Union Activity**

| No interest in Union |  | Low Activity |  | Average Activity |  | High Activity |  |
| --- | --- | --- | --- | --- | --- | --- | --- |

1. **Sector**

| Public Sector |  | Private Sector |  | Development Sector |  | Academic Sector |  | Other, please specify …………..... |
| --- | --- | --- | --- | --- | --- | --- | --- | --- |

**For the following statements, please give your rating: SA (Strongly Agree), A (agree), N (Neutral), D (disagree), SD (strongly disagree).**

**8. KNOWLEDGE OF CONFLICT**

|  | **Statement** | **SA** | **A** | **N** | **D** | **SD** |
| --- | --- | --- | --- | --- | --- | --- |
| a | Inter-professional conflict is prevalent in the healthcare sector |  |  |  |  |  |
| b | Inter-professional conflict affects healthcare delivery |  |  |  |  |  |
| c | Inter-professional conflict in Nigerian Healthcare is justified |  |  |  |  |  |
| d | Inter-professional rivalry is common in the healthcare sector |  |  |  |  |  |
| e | Inter-professional rivalry in the healthcare sector is healthy |  |  |  |  |  |
| f | Inter-professional rivalry in the healthcare sector is productive |  |  |  |  |  |

**9. EXPERIENCE OF CONFLICT**

|  | **Statement** | **SA** | **A** | **N** | **D** | **SD** |
| --- | --- | --- | --- | --- | --- | --- |
| a | I have experienced inter-professional conflict in my practice |  |  |  |  |  |
| b | I have experienced inter-professional rivalry in my practice |  |  |  |  |  |
| c | Inter-professional conflict has retarded my career progression |  |  |  |  |  |
| d | Inter-professional rivalry has positively influenced my professional career |  |  |  |  |  |
| e | My experience of inter-professional competition was healthy |  |  |  |  |  |
| f | I have witnessed rivalry/conflict result in negative clinical outcomes |  |  |  |  |  |

**10. ROLE OF REGULATION AND LEGISLATION**

|  | **Statement** | **SA** | **A** | **N** | **D** | **SD** |
| --- | --- | --- | --- | --- | --- | --- |
| a | Ministry of Health has a key role in resolving inter-professional conflict |  |  |  |  |  |
| b | Professional Registration Boards & Councils are critical in ending conflict |  |  |  |  |  |
| c | Legislation is required to end inter-professional conflict |  |  |  |  |  |
| d | Management of Agencies are implicated in inter-professional conflict |  |  |  |  |  |
| e | Ministry of Labour has a key role in resolving inter-professional conflict |  |  |  |  |  |

**11. LEADERSHIP OF HOSPITALS AND HEALTH AGENCIES**

|  | **Statement** | **SA** | **A** | **N** | **D** | **SD** |
| --- | --- | --- | --- | --- | --- | --- |
| a | Leadership of Hospitals/Agencies should be limited to one profession |  |  |  |  |  |
| b | Leadership should be based on relevant post graduate qualifications |  |  |  |  |  |
| c | Clinical expertise & experience are necessary for leadership |  |  |  |  |  |
| d | Cognate administrative expertise & experience are critical for leadership |  |  |  |  |  |
| e | Certificated management expertise is critical for Leadership |  |  |  |  |  |

**12. LEADERSHIP REFORMS**

|  | **Statement** | **SA** | **A** | **N** | **D** | **SD** |
| --- | --- | --- | --- | --- | --- | --- |
| a | Reforms are required in Leadership selection of Hospitals/Agencies |  |  |  |  |  |
| b | Collaborative working is key for leadership reforms to prevent conflict |  |  |  |  |  |
| c | Emphasising collaboration at undergraduate level can facilitate harmony |  |  |  |  |  |
| d | Indoctrinating mutual respect in healthcare training can prevent conflict |  |  |  |  |  |
| e | Organisational diversity should be considered in leadership reforms |  |  |  |  |  |
| f | Leadership training is critical for all health practitioners |  |  |  |  |  |
| g | Collaborative working needs to be inculcated in professional socialisation |  |  |  |  |  |

**Thank you for taking the time to complete this questionnaire**
